# Supplementary material
Source: PubMed Central journal article supplement (PMC1637065)

**Supplementary Material for “Two-Step Recruitment of RNA-directed DNA Methylation to Tandem Repeat Sequences.” by Simon W.-L. Chan, Yana Bernatavichute, Xiaoyu Zhang and Steven E. Jacobsen.**

**Supplementary Figure S1. Flowering time distribution for *rdr2-1*, *ago4-1*, and *drm1-1 drm2-1* compared to their respective wild-type ecotypes.**

Histograms show rosette leaf number on the X axis and number of plants on the Y axis. Late flowering was defined as 23 or more leaves for *rdr2-1/RDR2*, 10 or more leaves for *ago4-1/AGO4*, and 12 or more leaves for *drm1-1/DRM1 drm2-1/DRM2*.

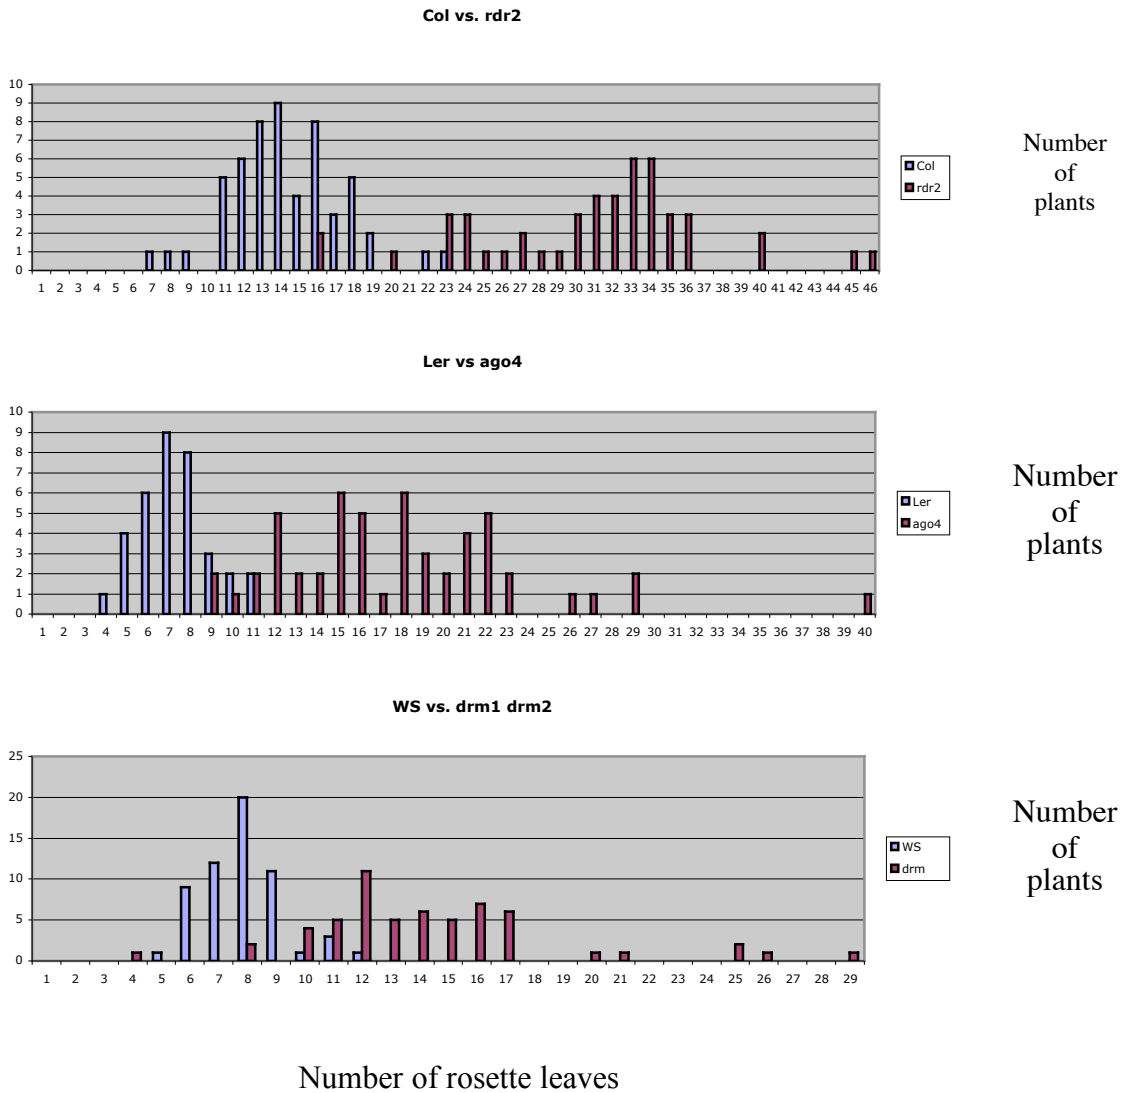

Supplement: pbio.0040363.sg001.pdf [file pbio.0040363.sg001.pdf]
