# Supplementary material
Source: PubMed Central journal article supplement (PMC1637065)
Supplement: pbio.0040363.sg003.pdf [file pbio.0040363.sg003.pdf]

# Supplemental Figure 3. Comparisons of the repeat characteristics of all TRs, unique TRs and unique TRs associated with siRNAs

all TRs

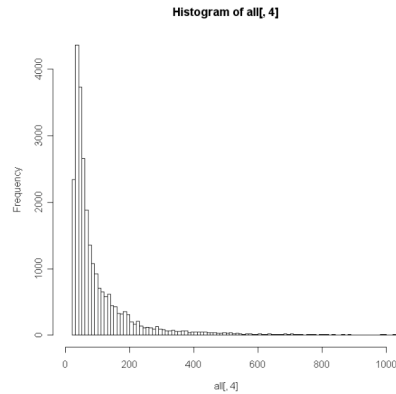

all unique TRs

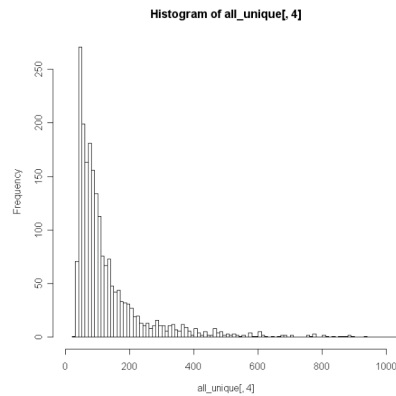

unique TRs  
with siRNAs

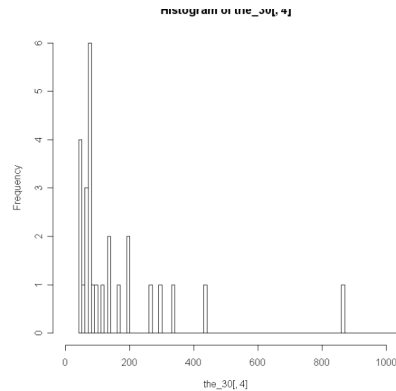

**Supplemental Figure 3A.** Comparison of the length of all TRs (top), unique TRs (middle) and unique TRs associated with siRNAs (bottom).

x-axis: length of each TR

y-axis: frequency

all TRs

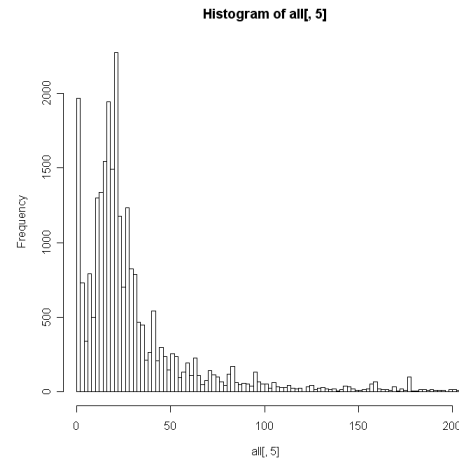

all unique TRs

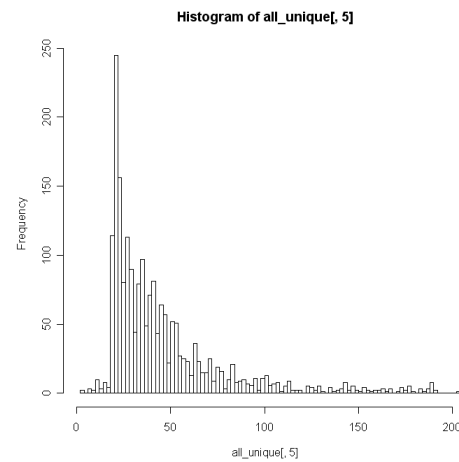

unique TRs  
with siRNAs

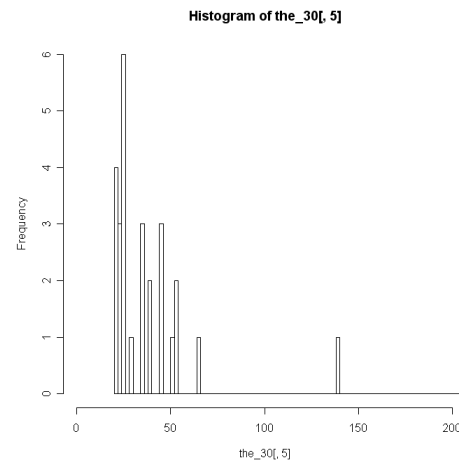

**Supplemental Figure 3B.**  
Comparison of the repeat  
unit length of all TRs (top),  
unique TRs (middle) and  
unique TRs associated with  
siRNAs (bottom).

x-axis: repeat unit length  
length of each TR

y-axis: frequency

all TRs

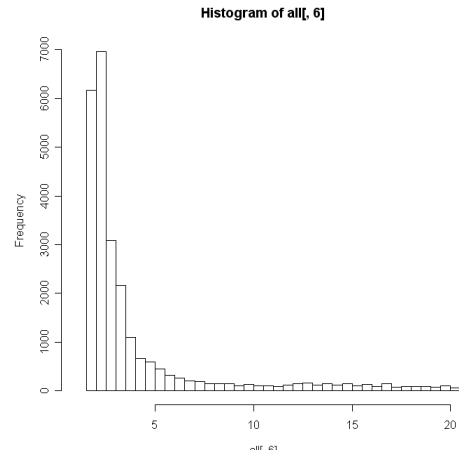

all unique TRs

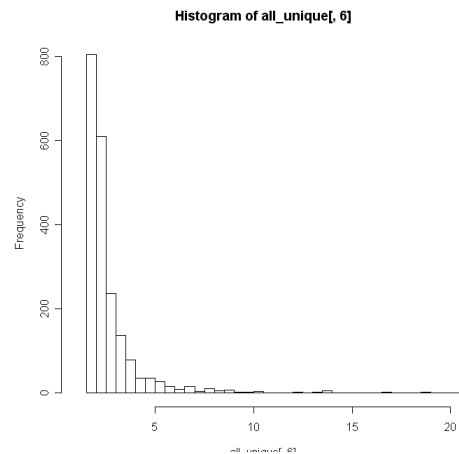

unique TRs  
with siRNAs

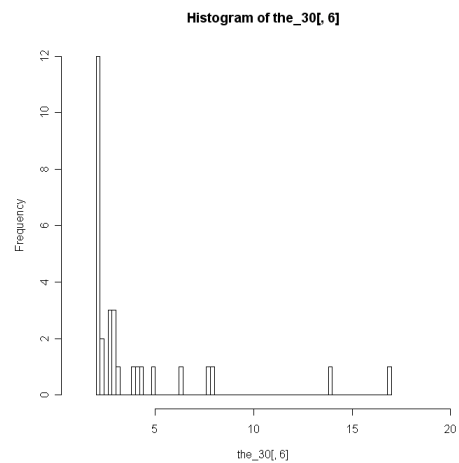

**Supplemental Figure 3C.**  
Comparison of the number of repeat units within each TR, for all TRs (top), unique TRs (middle) and unique TRs associated with siRNAs (bottom).

x-axis: number of repeat units within each TR

y-axis: frequency

all TRs

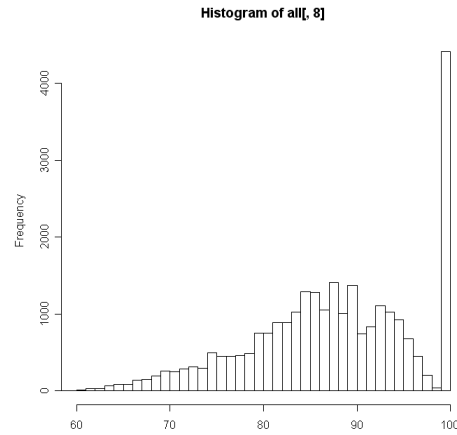

all unique TRs

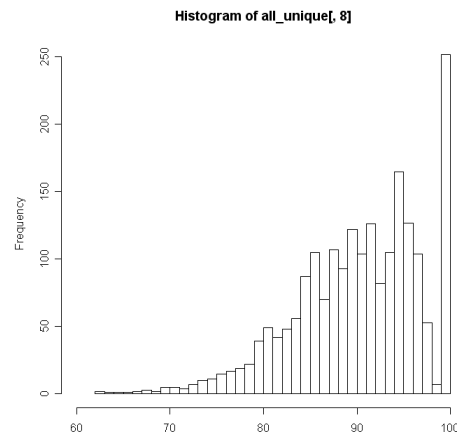

unique TRs  
with siRNAs

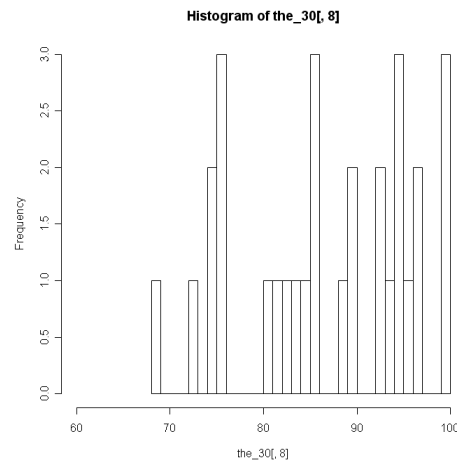

**Supplemental Figure 3D.**  
Comparison of the average identity among the repeat units within each TR, for all TRs (top), unique TRs (middle) and unique TRs associated with siRNAs (bottom).

*x*-axis: average identity among the repeat units within each TR

*y*-axis: frequency

all TRs

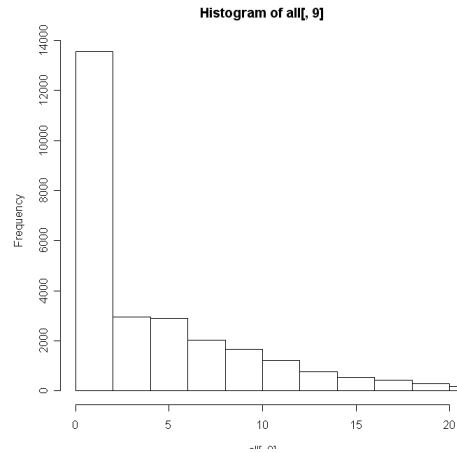

all unique TRs

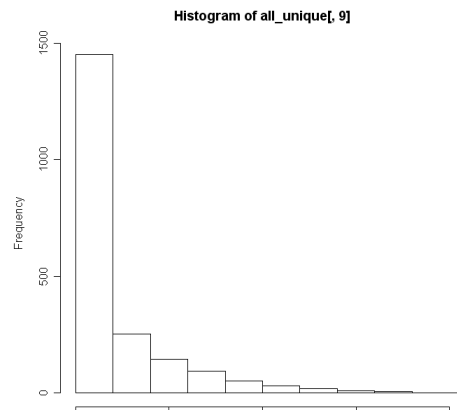

unique TRs  
with siRNAs

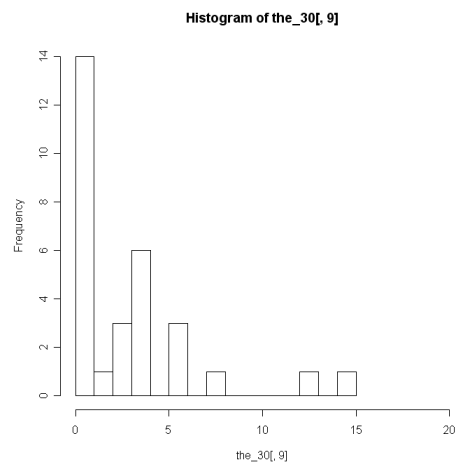

**Supplemental Figure 3E.**  
Comparison of the percentage of insertions and deletions (indels) among the repeat units within each TR, for all TRs (top), unique TRs (middle) and unique TRs associated with siRNAs (bottom).

x-axis: percentage of indels among the repeat units within each TR

y-axis: frequency

all TRs

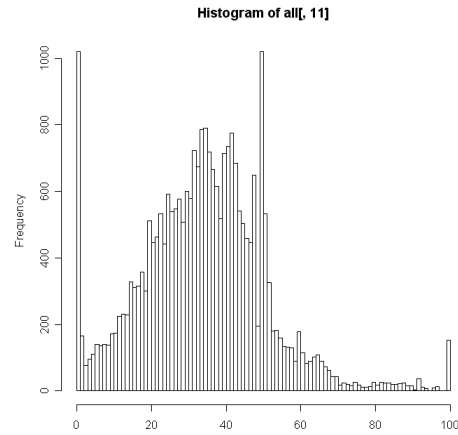

all unique TRs

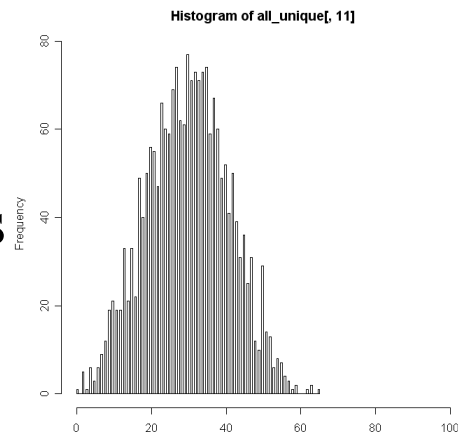

unique TRs  
with siRNAs

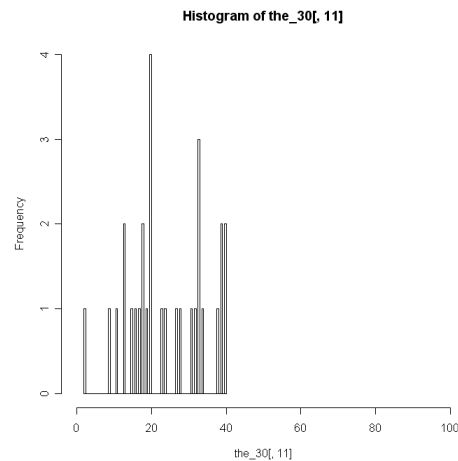

**Supplemental Figure 3F.**  
Comparison of the sequence content (% of A) of all TRs (top), unique TRs (middle) and unique TRs associated with siRNAs (bottom).

*x*-axis: percentage of indels among the repeat units within each TR

*y*-axis: frequency

all TRs

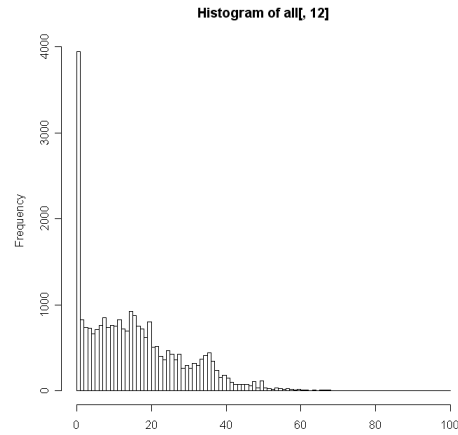

all unique TRs

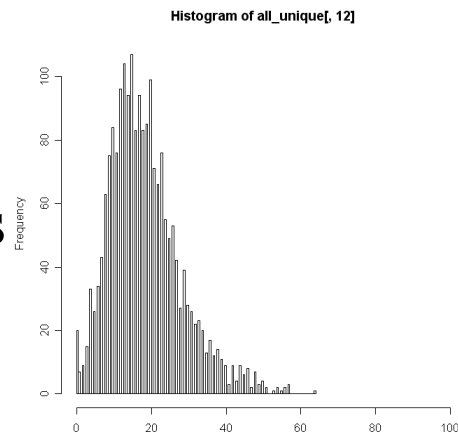

unique TRs  
with siRNAs

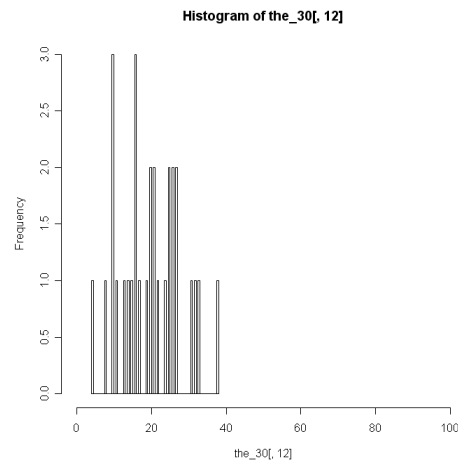

**Supplemental Figure 3G.**  
Comparison of the sequence content (% of C) of all TRs (top), unique TRs (middle) and unique TRs associated with siRNAs (bottom).

*x*-axis: percentage of indels among the repeat units within each TR

*y*-axis: frequency

all TRs

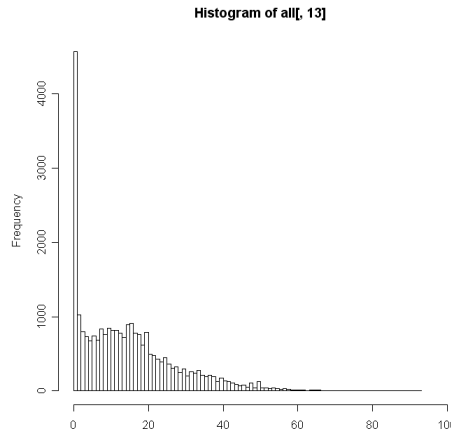

all unique TRs

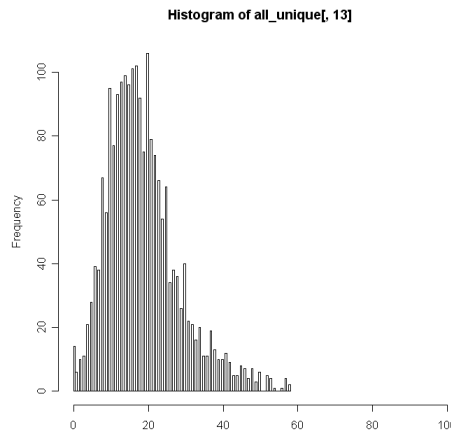

unique TRs  
with siRNAs

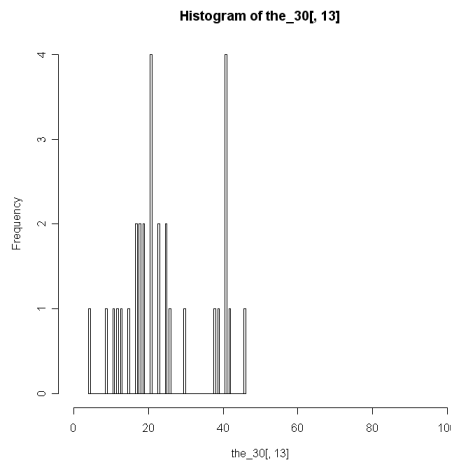

**Supplemental Figure 3H.**  
Comparison of the sequence content (% of G) of all TRs (top), unique TRs (middle) and unique TRs associated with siRNAs (bottom).

*x*-axis: percentage of indels among the repeat units within each TR

*y*-axis: frequency



all TRs

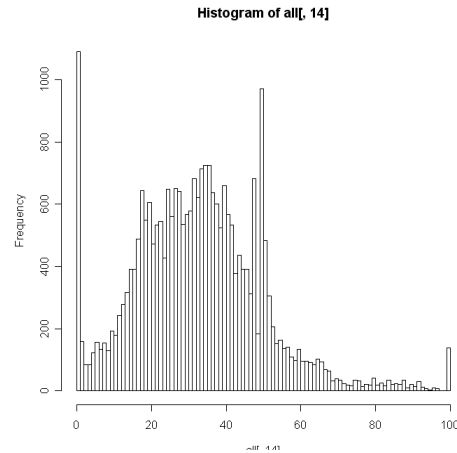

all unique TRs

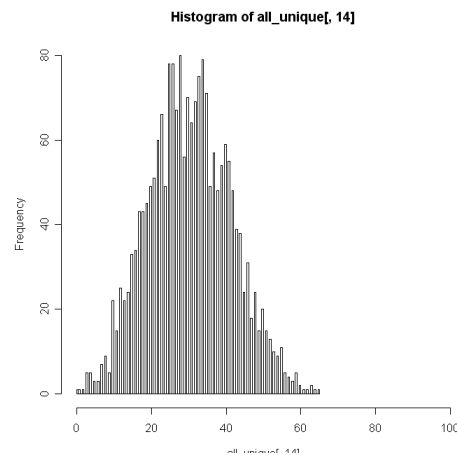

unique TRs  
with siRNAs

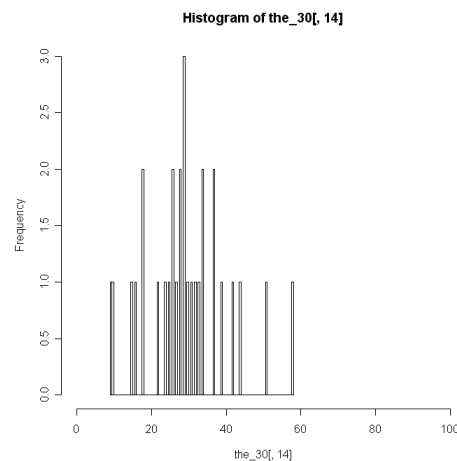

**Supplemental Figure 3I.**  
Comparison of the sequence content (% of T) of all TRs (top), unique TRs (middle) and unique TRs associated with siRNAs (bottom).

*x*-axis: percentage of indels among the repeat units within each TR

*y*-axis: frequency
