# Supplementary material
Source: PubMed Central journal article supplement (PMC1637065)
Supplement: pbio.0040363.sg004.pdf [file pbio.0040363.sg004.pdf]

## Supplementary Figure S4

### **Expression level of genes with and without unique tandem repeats in their promoter regions.**

The distribution of expression levels of A) all genes, B) genes containing unique tandem repeats (TRs, see text for a detailed definition of unique tandem repeats) within their promoter regions (defined as 1 kb upstream of transcription start site), and C) genes containing unique tandem repeats within their promoter regions that are also associated with siRNAs. The expression level of each gene is the average over 79 tissues and conditions (Schmid et al. 2005 Nat Genet 37: 501-506) shown in log<sub>2</sub> scale.

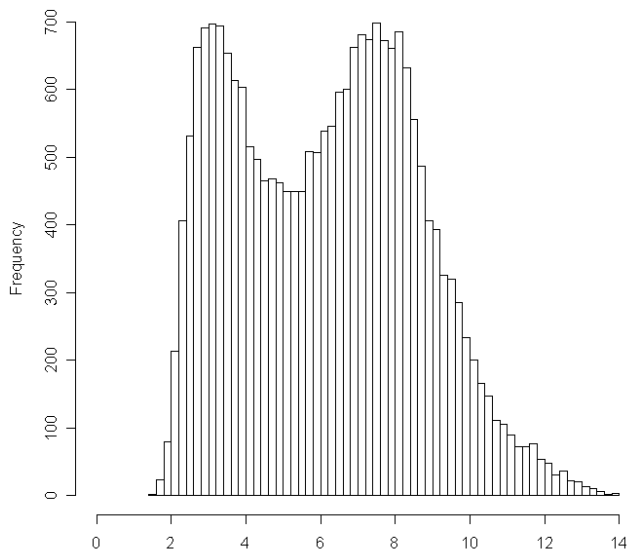

A) All genes

- x: intensity (log2 of RMA mean)
- y: frequency

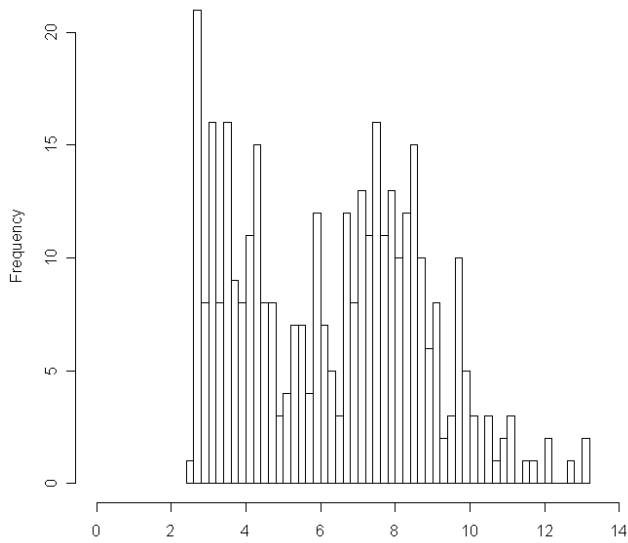

B) Genes with TRs in promoters (1 kb)

- x: intensity (log2 of RMA mean)
- y: frequency

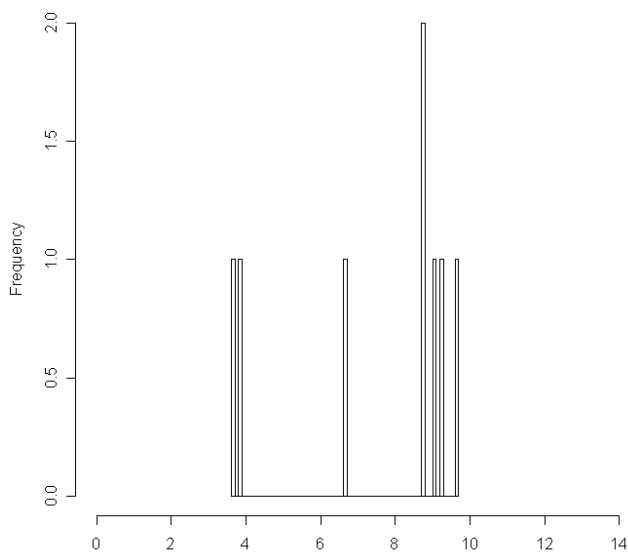

C) Genes with siRNA-associated TRs in promoters (1 kb)

- x: intensity (log2 of RMA mean)
- y: frequency
