# Supplementary material
Source: PubMed Central journal article supplement (PMC1637065)
Supplement: pbio.0040363.st001.pdf [file pbio.0040363.st001.pdf]

**Supplementary Material for “Two-Step Recruitment of RNA-directed DNA Methylation to Tandem Repeat Sequences.” by Simon W.-L. Chan, Yana Bernatavichute, Xiaoyu Zhang and Steven E. Jacobsen.**

**Table S1. Bisulfite genomic sequencing data.**

Number of cytosines methylated in different sequence contexts in cloned PCR products from bisulfite-treated DNA.

*FWA* T1 transgene. 20 CG sites, 10 CNG sites, 61 asymmetric sites.

*FWA* “single copy” T1 transgene. 11 CG sites, 5 CNG sites, 26 asymmetric sites.

|                                             | CG methylated   | CNG methylated | CHH (asymmetric) methylated |
|---------------------------------------------|-----------------|----------------|-----------------------------|
| Col + <i>FWA</i>                            | 117/240 (48.8%) | 32/120 (26.7%) | 84/732 (11.5%)              |
| Col + <i>FWA</i> single copy                | 0/286 (0%)      | 0/130 (0%)     | 1/676 (0.15%)               |
| <i>fwa-1</i> + <i>FWA</i> late flowering T1 | 0/420 (0%)      | 0/210 (0%)     | 5/1281 (0.4%)               |

*FWA* endogene. 20 CG sites, 10 CNG sites, 61 asymmetric sites.

|                                                            | CG methylated   | CNG methylated | CHH (asymmetric) methylated |
|------------------------------------------------------------|-----------------|----------------|-----------------------------|
| <i>Ler</i>                                                 | 335/400 (84%)   | 31/200 (16%)   | 83/1220 (6.8%)              |
| <i>rdr2-1</i>                                              | 352/400 (88%)   | 0/200 (0%)     | 6/1220 (0.5%)               |
| <i>nRPD1a-1</i>                                            | 347/400 (87%)   | 7/200 (3.5%)   | 10/1220 (0.8%)              |
| F1 <i>rdr2-1</i> x <i>nRPD1a-1</i>                         | 181/240 (75%)   | 13/120 (11%)   | 53/752 (7%)                 |
| <i>kyp-2</i>                                               | 375/440 (85.2%) | 20/242 (8.3%)  | 51/1342 (3.8%)              |
| F1 <i>kyp2</i> <i>rdr2-1</i> x <i>kyp2</i> <i>nRPD1a-1</i> | 297/340 (87.3%) | 21/170 (12.4%) | 94/1037 (9.1%)              |
