# Supplementary material
Source: PubMed Central journal article supplement (PMC1637065)
Supplement: pbio.0040363.st002.pdf [file pbio.0040363.st002.pdf]

**Supplementary Table S2****Chan et al "Two-step recruitment of RNA-directed DNA methylation to tandem repeats"**

| <b>PCR primer sequence</b>                                                                                                                                         | <b>Purpose</b>                                                                                                                                                      |
|--------------------------------------------------------------------------------------------------------------------------------------------------------------------|---------------------------------------------------------------------------------------------------------------------------------------------------------------------|
| TGACTGACAGCTGAAAATGGGATGTGGAT<br>GCCACTCCCTAGAACTCACCACCTAAGTT                                                                                                     | ago4-1 genotyping (CAPS marker with AvaII)<br>ago4-1 genotyping                                                                                                     |
| tag cat ctg aat ttc ata acc aat ctc gat aca c<br>aca cat tag gac taa caa att tac c<br>atg gtg tca gag acg acg acg aac cga tca                                      | rdr2-1 SAIL T-DNA left border primer<br>rdr2-1 genotyping<br>rdr2-1 genotyping                                                                                      |
| ggttttatattaatattaagagttatgggtygaagttt<br>caaaatactttacacataaacraaaaacaacaaatcraa                                                                                  | bisulfite sequencing of FWA<br>bisulfite sequencing of FWA                                                                                                          |
| caaaatactttacacataaacraaaaacaacaaatcraa<br>GTttAAGTGtTATTTGGTTGTTTAAGGTTGtTTTTAGtAt                                                                                | bisulfite PCR/ClaI assay of FWA methylation<br>bisulfite PCR/ClaI assay of FWA methylation                                                                          |
| ag+caa+cct+taa+aca+acc+aaa+tag+cac+ttg+gac+caa+tgg+cga+a<br>AT+ATG+AGA+TTC+TCG+ACG+GAA+AGA+TGT+ATG+GGC+TTCG<br>CTG+ATT+GTC+AGT+ATCCT+ACA+AATC+GAT+AAATC+GTA+AGA+AG | FWA LNA probe from Figure 4A<br>FWA LNA probe A1 (Supplementary Figure S3)<br>FWA LNA probe B2 (Supplementary Figure S3)<br>(+ indicates LNA at following position) |
| CCTTCGGGATTTTCGATAGTGCCA<br>CCCACCAAGATCTGAAGTCC<br>CAGGTGCAATGGTGGTGTAT                                                                                           | Taqman probe for FWA real-time RT-qPCR<br>FWA RT-qPCR<br>FWA RT-qPCR                                                                                                |
| Ttt tcc cta gtt gag atg gga att gaa<br>Cagcatcatcacaagcatcc<br>Tcgtggtggtgagtttggttac                                                                              | Taqman probe for ACT7 real-time RT-qPCR<br>ACT7 RT-qPCR<br>ACT7 RT-qPCR                                                                                             |
| aaa gtg gtt gta gtt tat gaa agg ttt tat<br>CTTAAAAAATTTTCAACTCATTTTTAAAAAA                                                                                         | bisulfite PCR/BamHI assay of MEA-ISR methylation<br>bisulfite PCR/BamHI assay of MEA-ISR methylation                                                                |
